# Supplementary material for: Elevated SRPK1 lessens apoptosis in breast cancer cells through RBM4-regulated splicing events
Source: PubMed Central journal article supplement — RNA. 2014 Oct;20(10):1621–31. doi: 10.1261/rna.045583.114 (PMC4174443; doi:10.1261/rna.045583.114), 2014-10

**Supplemental FIG S1** The FLAG-tagged S309A and FLAG-tagged RBM4 plasmid was separately cotransfected with the empty or SRPK1-expressing vector into MCF7 cells for 24 h. The cell lysate (left row) and subcellular fraction (right row) were subjected to an immunoblotting assay using anti-FLAG M2 and anti-lamin antibodies.

## Supplemental Figure S1

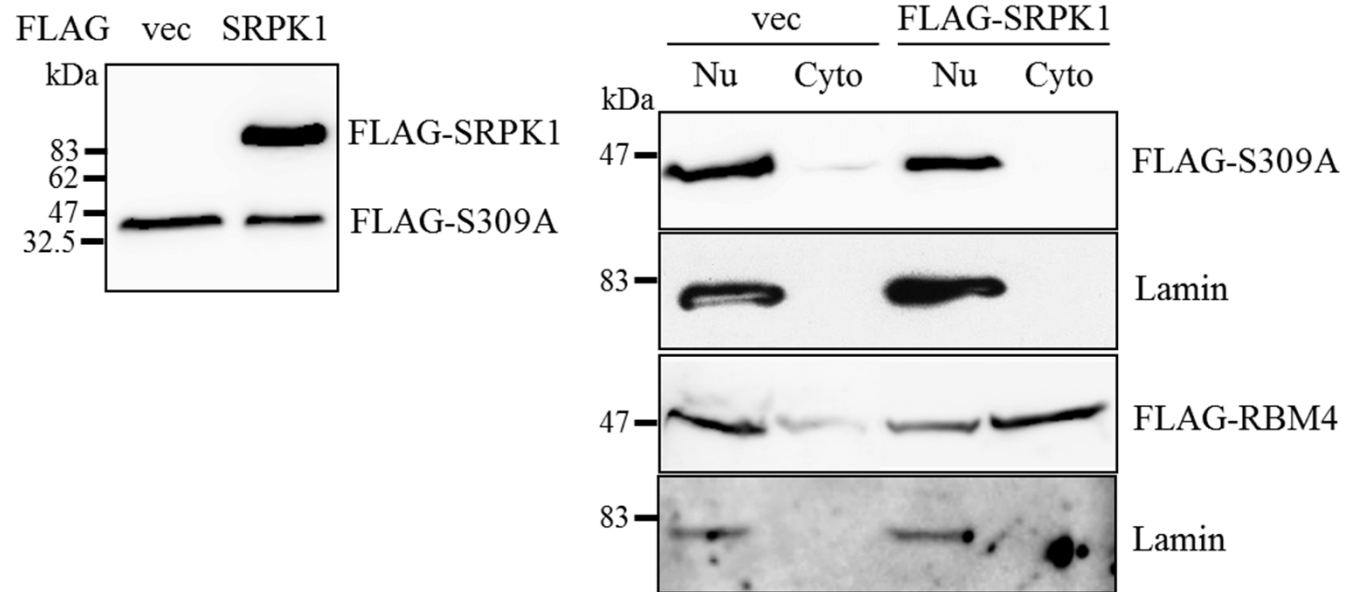

Supplement: supp_045583.114_SuppFigS1.pdf [file supp_045583.114_SuppFigS1.pdf]
